# Supplementary material
Source: publisher figshare collection journal article supplement (https://acs.figshare.com/ndownloader/files/4541638)
Supplement: Supplementary file 1 [file 4541638]

## Supporting Information Section

**Origin of the  $\alpha$ -,  $\beta$ -, ( $\alpha\beta$ )-, and “slow” dielectric processes in poly(ethyl methacrylate).**

**K. Mpoukouvalas, G. Floudas\* and G. Williams\***

### **A. Derivation of the expressions for the ratio $\mathfrak{R}$ of the constant volume and constant pressure apparent activation energies**

Case 1.  $W = Y, X \neq Z$

e.g.  $VP/VT$ , Eq.(6) of the text, is obtained as follows.

We start by writing  $\tau=\tau(T, V)$ ,  $\tau=\tau(T, P)$  with  $V=V(T, P)$  giving

$$(\partial \ln \tau / \partial V)_P = (\partial \ln \tau / \partial T)_V (\partial T / \partial V)_P + (\partial \ln \tau / \partial V)_T \quad (\text{S.1})$$

$$(\partial \ln \tau / \partial T)_P = (\partial \ln \tau / \partial T)_V + (\partial \ln \tau / \partial V)_T (\partial V / \partial T)_P \quad (\text{S.2})$$

hence

$$\begin{aligned} VP/VT &= (\partial \ln \tau / \partial V)_P / (\partial \ln \tau / \partial V)_T = 1 + ((\partial \ln \tau / \partial T)_V (\partial T / \partial V)_P / (\partial \ln \tau / \partial V)_T) \\ &= 1 - (\partial V / \partial T)_T / (\partial V / \partial T)_P \end{aligned} \quad (\text{S.3})$$

Using Eq.(S.2) to replace  $(\partial \ln \tau / \partial V)_T$  on the right hand side of Eq.(S.3) gives

$$VP/VT = (1 - \mathfrak{R})^{-1} \quad (\text{S.4})$$

Eqs.(S3) and (S4) correspond to Eq.(6) of the text. Eq.(7) follows from the definition of  $\mathfrak{R}$  while Eq.(8) is obtained by a procedure similar to that used to derive Eq.(6).

Case 2.  $W = Z, X = Y$

e.g.  $PT/TP$  Eq.(11) is obtained by writing  $\tau = \tau(T, P)$

$$(\partial \ln \tau / \partial T)_V = (\partial \ln \tau / \partial T)_P + (\partial \ln \tau / \partial P)_T (\partial P / \partial T)_V \quad (\text{S.5})$$

$$\begin{aligned}
PT/TP &= [(\partial \ln \tau / \partial T)_V - (\partial \ln \tau / \partial T)_P] / ((\partial \ln \tau / \partial T)_P (\partial P / \partial T)_V) \\
&= -(1 - \mathfrak{R}) / (\partial P / \partial T)_V = -(\partial T / \partial P)_\tau
\end{aligned} \tag{S.6}$$

Eq.(9) and (10) of the text are obtained by a similar procedure, writing  $\tau = \tau(T, V)$  and  $\tau = \tau(P, V)$  respectively.

Case 3.  $W = Z, X \neq Y$

e.g.  $TP/VT$ , Eq.(12) is obtained from Eq.(7) and (9) as

$$(TV/VT) / (TV/TP) = (\partial V / \partial T)_P (1 - \mathfrak{R})^{-1} \tag{S.7}$$

In a similar manner Eq.(7) and Eq.(11) give  $TV/PT$  (Eq.13); Eq.(8) and (10) give  $PT/VP$ , Eq.(14); Eq.(8) and (11) give  $PV/TP$  Eq.(15); Eq.(6) and (9) give  $VP/TV$  (Eq.(16) while Eq.(6) and (10) give  $VT/PV$  (Eq.17).

Case 4.  $W \neq X, Y \neq Z$

e.g. Eq.(18)-(20) may be confirmed as follows; e.g. for Eq.(20) using Eq.(8) and (17)

$$(PT/VT) = (PT/PV)(PV/VT) = (\partial V / \partial P)_T \tag{S.8}$$

A further set of equations of the form  $\mathfrak{R} = (1 + \lambda)^{-1}$  may be obtained from the generalized Arrhenius equation  $\tau = \tau_0 \exp[Q(T, P) / RT]$ . It is easy to show that

$$\begin{aligned}
TP &= -\frac{Q}{RT^2} [1 - T(\partial \ln Q / \partial T)_P] & ; & \quad TV = -\frac{Q}{RT^2} [1 - T(\partial \ln Q / \partial T)_V] \\
PT &= \frac{1}{RT} (\partial Q / \partial P)_T & ; & \quad VT = \frac{1}{RT} (\partial Q / \partial V)_T
\end{aligned} \tag{S.9a-d}$$

From Eq.7 we write

$$\Re = TV/TP = \frac{1 - T(\partial \ln Q / \partial T)_V}{1 - T(\partial \ln Q / \partial T)_P} = \frac{A}{1 + \lambda_a} \quad (\text{S.10})$$

where  $A = 1 - T(\partial \ln Q / \partial T)_V$  and  $\lambda_a = -T(\partial \ln Q / \partial T)_P$ . Two further relations for  $\Re$  are obtained by a similar method, giving

$$\Re = [1 + \lambda_b / A]^{-1} \quad ; \quad \Re = [1 + \lambda_c / A]^{-1} \quad (\text{S.11a,b})$$

where  $\lambda_b = T(\partial \ln Q / \partial P)_T(\partial P / \partial T)_V$  and  $\lambda_c = -T(\partial \ln Q / \partial V)_T(\partial V / \partial T)_P$ .

For the case  $Q = Q(V)$  then  $A = 1$ . Roland and coworkers proposed that  $Q = Q(V) = C/V^\gamma$  may be applied to the  $\alpha$ -process in glass-forming materials.<sup>34,35</sup> For this case  $(d \ln Q / d \ln V) = -\gamma$  giving  $\lambda_a = \lambda_b = \lambda_c = T\alpha_p\gamma$ , so  $\Re = [1 + T\alpha_p\gamma]^{-1}$ .

## B. Further Dielectric Data

Additional dielectric loss data are provided for PEMA ( $M_w = 2.0 \times 10^3$  g/mol) under “isothermal” conditions at 383.15 K ( $T \gg T_g$ ) (in Figure S1). The spectra show the separation of the  $\alpha\beta$ -process to  $\alpha$ - and  $\beta$ -processes that are well resolved at elevated pressures. Figure S2, comprises the temperature normalized dielectric strengths ( $T\Delta\epsilon$ ) for the three processes at all temperatures investigated as a function of applied pressure. The complementarity in the dielectric strengths of the  $\alpha$ - and  $\beta$ -processes can be seen. In Figure S3, the experimentally obtained ratio of activation energies, obtained from the  $\tau(\rho)$  representation using Eq. (6), is shown for each of the relaxation processes. This is made by coupling the relaxation times measured under “isobaric”  $\tau(T)$  and “isothermal”  $\tau(P)$  conditions with the equation of state  $V(T, P)$ .

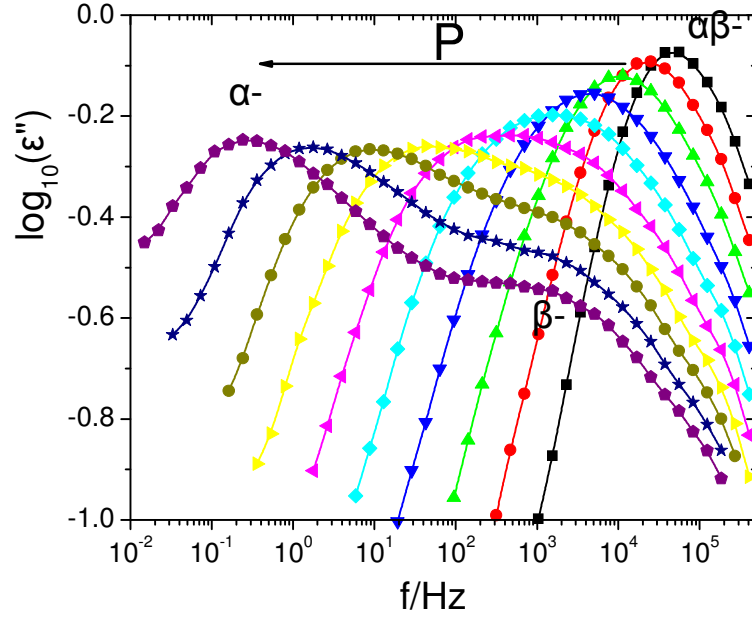

**Figure S1.** Dielectric loss curves for PEMA ( $M_w=2.0 \times 10^3$  g/mol) under “isothermal” conditions at  $T=383.15$  K. The curves are at (squares): 0.1, (circles): 30, (up triangles): 60, (down triangles): 90, (rhombus): 120, (left triangles): 150, (right triangles): 180, (polygons): 210, (stars): 240 and (pentagons): 270 MPa.

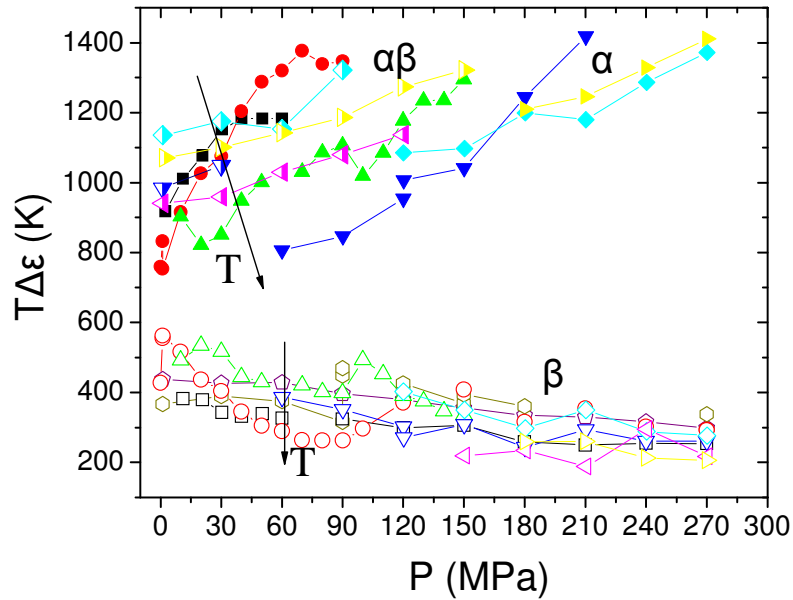

**Figure S2.** Pressure dependence of the dielectric strength  $T\Delta\epsilon$  of PEMA ( $M_w=2.0 \times 10^3$  g/mol), corresponding to the three processes as follows:  $\beta$ - (open symbols),  $\alpha$ - (filled symbols) and  $\alpha\beta$ -

process (half-filled symbols) at the different temperatures investigated: (pentagons): 323.15, (polygons): 333.15, (squares): 343.15, (circles): 353.15, (up triangles): 363.15, (down triangles): 373.15, (rhombus): 383.15, (left triangles): 393.15 and (right triangles): 403.15 K.

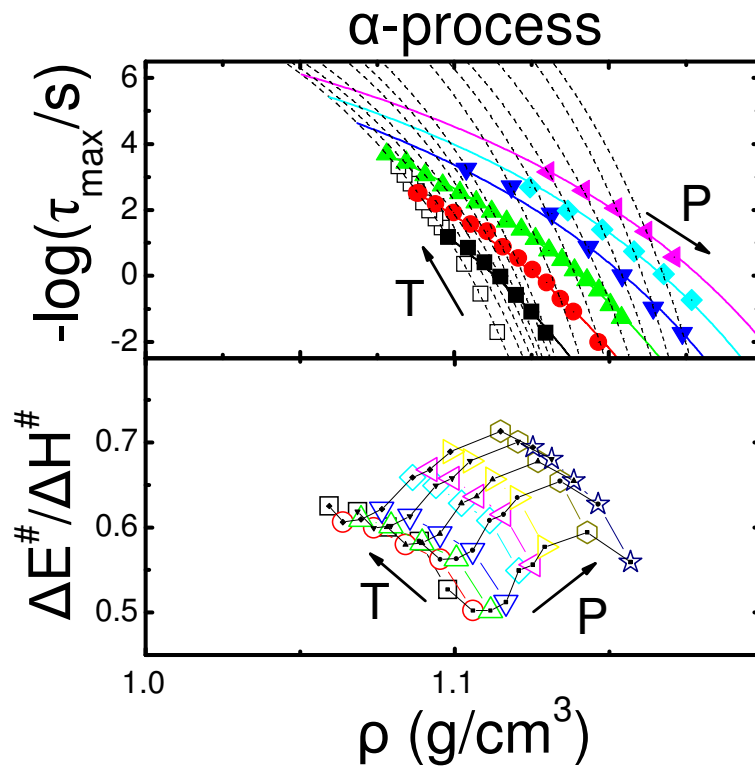

**Figure S3a. (Top):** Dependence of the “isothermal” (solid lines) and “isobaric” (dashed lines) relaxation times of PEMA ( $M_w=2.0 \times 10^3$  g/mol) on density. The “isothermal” and “isobaric” lines, are the result of the fits to the modified VFT equation (Eq. 28) to the  $\alpha$ -process. The different “isotherms” are: (squares): 343.15, (circles): 353.15, (up triangles): 363.15, (down triangles): 373.15, (rhombus): 383.15 and (left triangles): 393.15 K. In all cases the “isobaric” data at  $P=0.1$  MPa are shown with open squares. **(Bottom):** Ratio  $\mathfrak{R}$ , of the constant-volume activation energy ( $\Delta E^{\#}$ ) to the enthalpy of activation ( $\Delta H^{\#}$ ) for the  $\alpha$ -process plotted against density. The “isobars” are now shown with open symbols: (squares): 0.1, (circles): 10, (up triangles): 20, (down triangles): 30, (rhombus): 40, (left triangles): 50, (right triangles): 60, (polygons): 90 and (stars): 120 MPa.

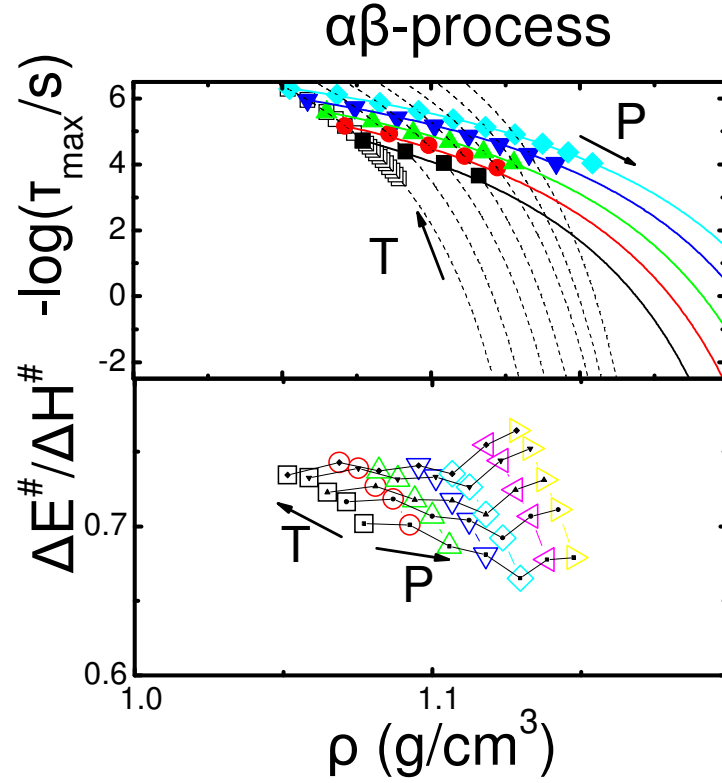

**Figure S3b. (Top):** Dependence of the “isothermal” (solid lines) and “isobaric” (dashed lines) relaxation times of PEMA ( $M_w=2.0 \times 10^3$  g/mol) on density corresponding to the ( $\alpha\beta$ )-process. The “isothermal” and “isobaric” lines, are the result of the fits to the modified VFT equation (Eq. 28). The different “isotherms” are: (squares): 383.15, (circles): 393.15, (up triangles): 403.15, (down triangles): 413.15 and (rhombus): 423.15 K. In all cases the “isobaric” data at  $P=0.1$  MPa are shown with open squares. **(Bottom):** Ratio  $\mathfrak{R}$ , of the constant-volume activation energy ( $\Delta E^{\#}$ ) to the enthalpy of activation ( $\Delta H^{\#}$ ) for the ( $\alpha\beta$ )-process plotted against density. The “isobars” are now shown with open symbols that correspond to: (squares): 0.1, (circles): 30, (up triangles): 60, (down triangles): 90, (rhombus): 120, (left triangles): 150 and (right triangles): 180 MPa.

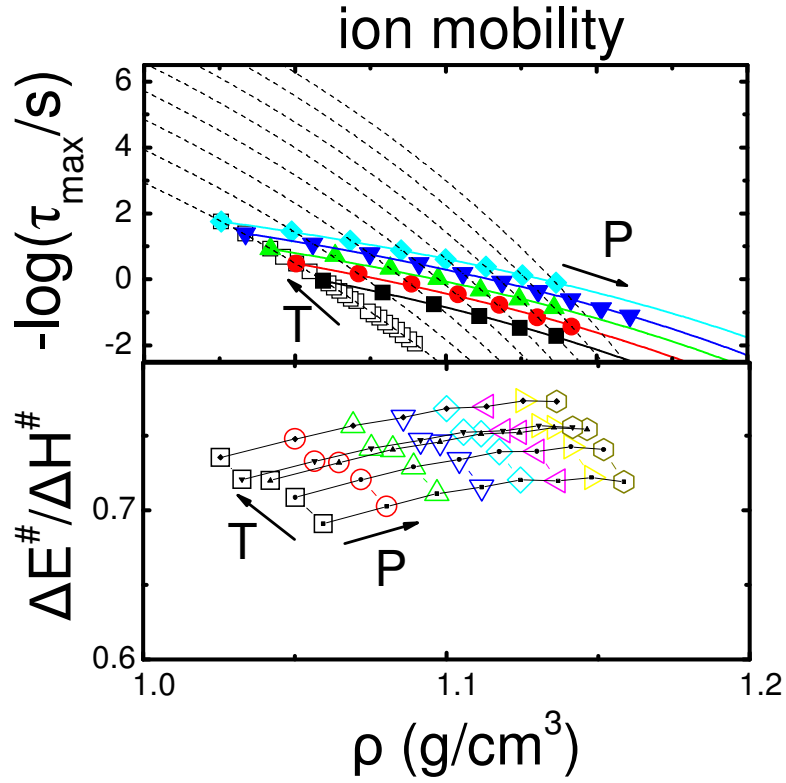

**Figure S3c. (Top):** Dependence of the “isothermal” (solid lines) and “isobaric” (dashed lines) relaxation times of PEMA ( $M_w=2.0 \times 10^3$  g/mol) on density. The “isothermal” and “isobaric” lines, are the result of the fits to the modified VFT equation (Eq. 28) to ion mobility process. The different “isotherms” are: (squares): 383.15, (circles): 393.15, (up triangles): 403.15, (down triangles): 413.15 and (rhombus): 423.15 K. In all cases the “isobaric” data at  $P=0.1$  MPa are shown with open squares. **(Bottom):** Ratio  $\mathfrak{R}$ , of the constant-volume activation energy ( $\Delta E^{\#}$ ) to the enthalpy of activation ( $\Delta H^{\#}$ ) for the ion mobility process plotted against density. The “isobars” are now shown with open symbols: (squares): 0.1, (circles): 30, (up triangles): 60, (down triangles): 90, (rhombus): 120, (left triangles): 150, (right triangles): 180 and (polygons): 210 MPa.
